# Supplementary material for: Highly ordered mesoporous NiCo2O4with superior pseudocapacitance performance for supercapacitors
Source: Royal Society of Chemistry journal article supplement (doi:10.1039/c5ta01746g), 2015-01-01
Supplement: c5ta01746g1.pdf [file c5ta01746g1.pdf]

# Highly Ordered Mesoporous NiCo<sub>2</sub>O<sub>4</sub> with Superior Pseudocapacitance Performance for Supercapacitors

Lei An<sup>a</sup>, Qilong Ren<sup>a</sup>, Wenyao Li<sup>a,b</sup>, Kaibing Xu<sup>a</sup>, Yunjiu Cao<sup>a,c</sup>, Tao Ji<sup>a,c</sup>, Rujia Zou<sup>a,d</sup>,  
Zhigang Chen<sup>a</sup>, and Junqing Hu<sup>\*a</sup>

<sup>a</sup> State Key Laboratory for Modification of Chemical Fibers and Polymer Materials,  
College of Materials Science and Engineering, Donghua University, Shanghai  
201620, China.

<sup>b</sup> School of Material Engineering, Shanghai University of Engineering Science,  
Shanghai 201620, China.

<sup>c</sup> School of Fundamental Studies, Shanghai University of Engineering Science,  
Shanghai 201620, China.

<sup>d</sup> Center of Super-Diamond and Advanced Films (COSDAF), Department of Physics  
and Materials Science, City University of Hong Kong, Hong Kong.

E-mail: hu.junqing@dhu.edu.cn

## Part I: Calculations

The specific capacitance ( $C$ ) of the electrode was calculated from the discharge curves using the following formula<sup>1</sup>:

$$C = \frac{I \times \Delta t}{m \times \Delta V}$$

where  $I$  (A),  $\Delta t$  (s),  $m$  (g), and  $\Delta V$  (V) are the discharge current, discharge time consumed in the potential range of  $\Delta V$ , mass of the active materials, and the potential windows, respectively.

The energy density ( $E$ ) and power density ( $P$ ) are calculated from the discharge curves using the following formula:

$$E = \text{Error!} \times C \times \Delta V^2$$
$$P = \frac{E}{\Delta t}$$

1. J. Yan, E. Khoo, A. Sumboja and P. S. Lee. *ACS Nano*, 4 (2010), 4247.

## Part II: Supplementary Figures

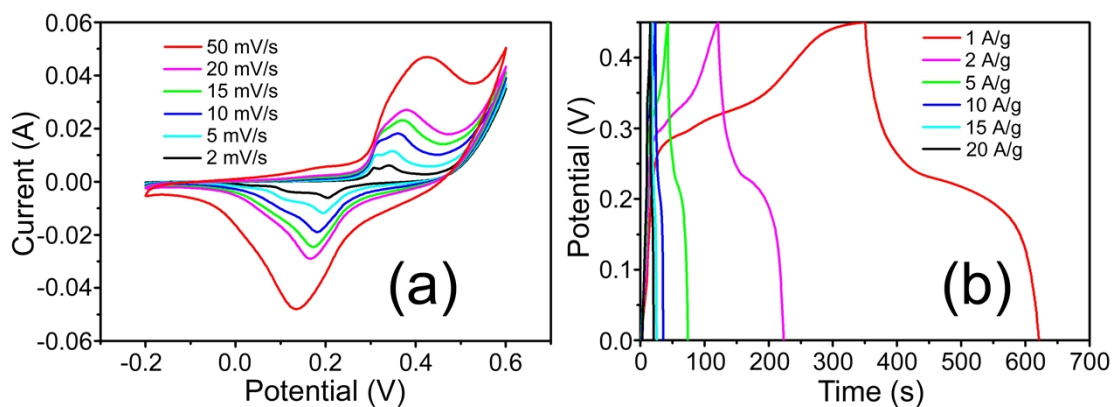

Fig. S1 (a) CV curves at different scan rates and (b) galvanostatic charge-discharge curves at different current densities of the conventional NiCo<sub>2</sub>O<sub>4</sub>, respectively.

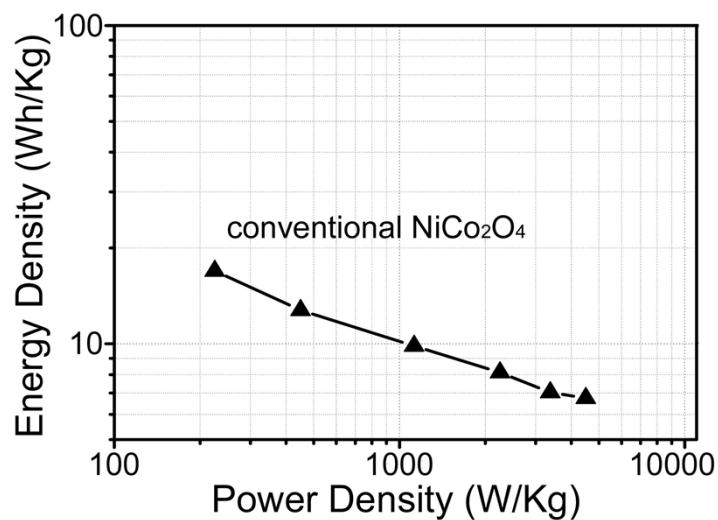

Fig. S2 Ragone plot (energy density vs. power density) of the conventional NiCo<sub>2</sub>O<sub>4</sub>.

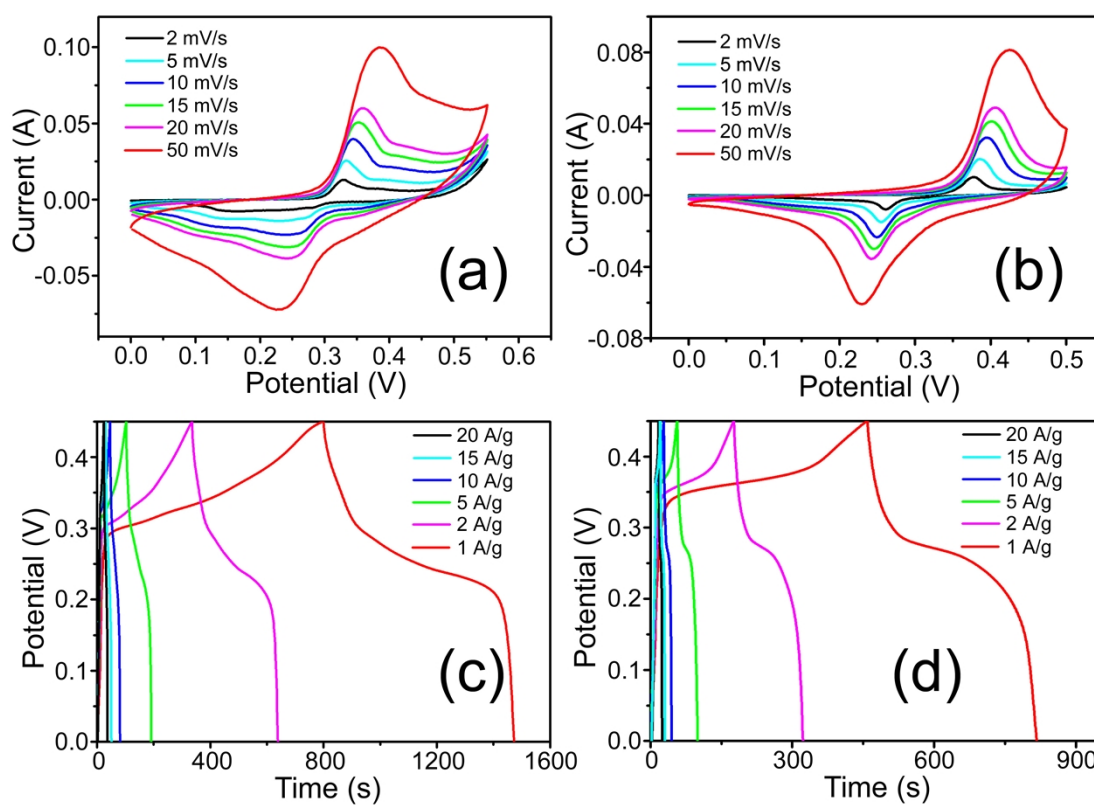

Fig. S3 CV curves at different scan rates and galvanostatic charge-discharge curves at different current densities of the mesoporous Co<sub>3</sub>O<sub>4</sub> (a, c) and mesoporous NiO (b, d), respectively.

Table S1 A comparison of the capacitance for the highly ordered mesoporous  $\text{NiCo}_2\text{O}_4$  electrode material with other reported  $\text{NiCo}_2\text{O}_4$  electrodes in previous literatures.

| Electrode Materials                                       | Specific Capacitance | Ref.      |
|-----------------------------------------------------------|----------------------|-----------|
| Highly ordered mesoporous $\text{NiCo}_2\text{O}_4$       | 1699 F/g at 1 A/g    | This work |
| Porous $\text{NiCo}_2\text{O}_4$ hetero-structure arrays  | 891 F/g at 1 A/g     | 16        |
| $\text{NiCo}_2\text{O}_4$ nanorods                        | 565 F/g at 1 A/g     | 18        |
| Porous $\text{NiCo}_2\text{O}_4$ nanowires                | 743 F/g at 1 A/g     | 20        |
| Porous $\text{NiCo}_2\text{O}_4$ flowerlike nanostructure | 658 F/g at 1 A/g     | 21        |
| Porous $\text{NiCo}_2\text{O}_4$ nanostructures           | 1197 F/g at 1 A/g    | 25        |
| porous spinel $\text{NiCo}_2\text{O}_4$                   | 726.8 F/g at 1 A/g   | 36        |
| Flower-shaped $\text{NiCo}_2\text{O}_4$ microsphere       | 1006 F/g at 1 A/g    | 37        |

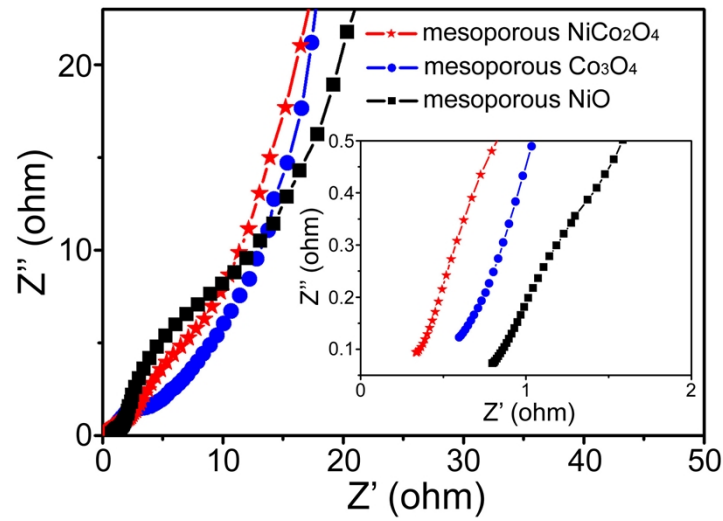

Fig. S4 EIS spectra comparison of the mesoporous  $\text{NiCo}_2\text{O}_4$ , mesoporous  $\text{Co}_3\text{O}_4$  and mesoporous  $\text{NiO}$  electrodes, respectively.
